# Supplementary material for: Regioisomer-manipulating thio-perylenediimide nanoagents for photothermal/photodynamic theranostics
Source: Royal Society of Chemistry journal article supplement (doi:10.1039/d0tb00566e), 2020-01-01
Supplement: d0tb00566e1.pdf [file d0tb00566e1.pdf]

# Electronic Supplementary Information

## Regioisomer-Manipulating Thio-Perylenediimide Nanoagents for Photothermal/Photodynamic Theranostics

*Zhonghua Liu,<sup>a</sup> Yijian Gao,<sup>a</sup> Xin Jin,<sup>b</sup> Qingyuan Deng,<sup>a</sup> Zengle Yin,<sup>a</sup> Shuaihang Tong,<sup>b</sup> Weixia  
Qing<sup>a\*</sup> and Yongwei Huang<sup>a\*</sup>*

<sup>a</sup>Laboratory for NanoMedical Photonics, School of Basic Medical Science, Henan University,  
Kaifeng 475004, China.

E-mail: qingwx@henu.edu.cn (W. Qing) and hywei79@126.com (Y. Huang)

<sup>b</sup>School of Pharmacy, Henan University, Kaifeng 475004, China.

Table S1. Photophysical properties of reported perylene agents.

| PTT agents                | PCE (%) | Laser irradiation              | Concentration            |
|---------------------------|---------|--------------------------------|--------------------------|
| PLAC-PDI NPs <sup>1</sup> | 42%     | 730 nm, 0.5 W cm <sup>-2</sup> | 0.60 mg mL <sup>-1</sup> |
| TNMs <sup>2</sup>         | 41 %    | 660 nm, 1 W cm <sup>-2</sup>   | 50 μM                    |
| PDS-PDI <sup>3</sup>      | 40 %    | 660 nm, 0.5 W cm <sup>-2</sup> | 0.5 mg mL <sup>-1</sup>  |
| PDI-PEG <sup>4</sup>      | 43%     | 660 nm, 1W cm <sup>-2</sup>    | 100 μg mL <sup>-1</sup>  |

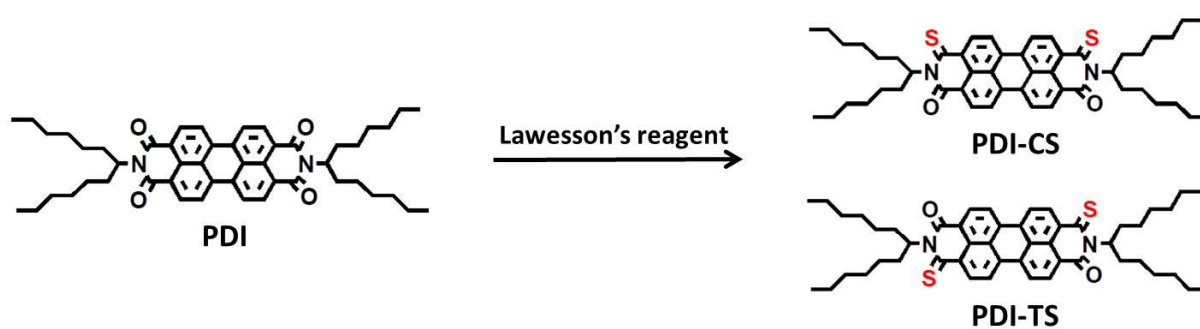

Fig. S1. Synthesis and structures of PDI-CS and PDI-TS.

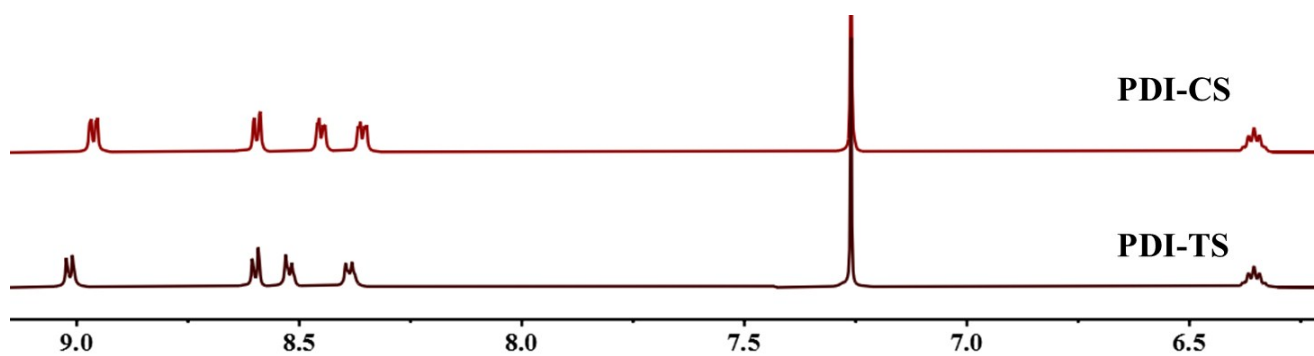

Fig. S2. Partial <sup>1</sup>H NMR spectra of PDI-CS, PDI-TS.

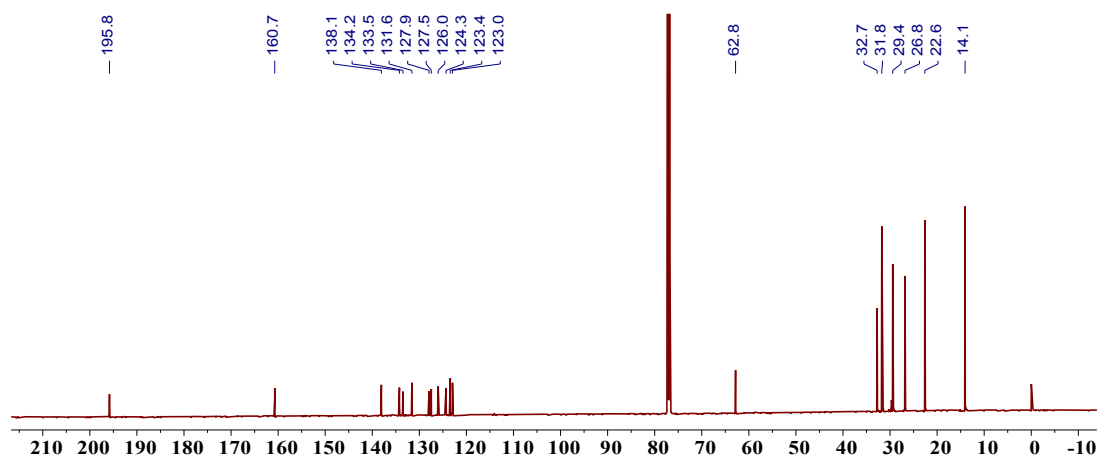

Fig. S3.  $^{13}\text{C}$  NMR spectrum of PDI-CS.

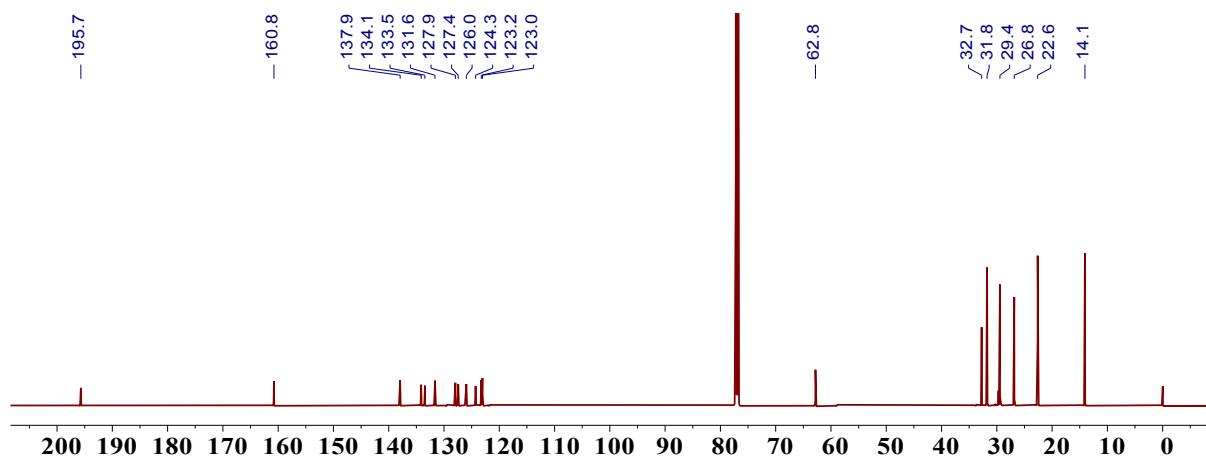

Fig. S4.  $^{13}\text{C}$  NMR spectrum of PDI-TS.

National Center for Organic Mass Spectrometry in Shanghai  
Shanghai Institute of Organic Chemistry  
Chinese Academic of Sciences  
High Resolution MS DATA REPORT



---

Instrument: Thermo Fisher Scientific LTQ FT Ultra  
Card Serial Number : D20200628  
Sample Serial Number: PDI-CS  
Operator : DONG      Date: 2020/04/03  
Operation Mode: DART POSITIVE

Elemental composition search on mass 787.43

| m/z      | Theo. Mass | Delta (ppm) | RDB equiv. | Composition                                                                  |
|----------|------------|-------------|------------|------------------------------------------------------------------------------|
| 787.4323 | 787.4325   | -0.34       | 20.5       | C <sub>50</sub> H <sub>63</sub> O <sub>2</sub> N <sub>2</sub> S <sub>2</sub> |
|          | 787.4332   | -1.17       | 29.5       | C <sub>58</sub> H <sub>59</sub> S                                            |
|          | 787.4312   | 1.37        | 21.0       | C <sub>48</sub> H <sub>61</sub> O <sub>2</sub> N <sub>2</sub> S <sub>2</sub> |
|          | 787.4344   | -2.64       | 26.0       | C <sub>52</sub> H <sub>57</sub> O <sub>4</sub> N <sub>3</sub>                |
|          | 787.4299   | 3.06        | 16.0       | C <sub>47</sub> H <sub>65</sub> O <sub>5</sub> N <sub>2</sub> S <sub>2</sub> |
|          | 787.4292   | 3.94        | 25.5       | C <sub>53</sub> H <sub>59</sub> O <sub>2</sub> N <sub>2</sub> S              |
|          | 787.4357   | -4.34       | 25.5       | C <sub>54</sub> H <sub>59</sub> O <sub>5</sub>                               |
|          | 787.4285   | 4.77        | 16.5       | C <sub>45</sub> H <sub>63</sub> O <sub>4</sub> N <sub>4</sub> S <sub>2</sub> |

Fig.S5. HRMS of PDI-CS. calcd for C<sub>50</sub>H<sub>62</sub>N<sub>2</sub>O<sub>2</sub>S<sub>2</sub>, 786.4253 m/z, found [M+H]<sup>+</sup> 787.4323.

Instrument: Thermo Fisher Scientific LTQ FT Ultra

Card Serial Number : D20200630

Sample Serial Number: PDI-TS

Operator : DONG Date: 2020/04/03

Operation Mode: DART POSITIVE

Elemental composition search on mass 787.43

| m/z      | Theo. Mass | Delta (ppm) | RDB equiv. | Composition                                                                  |
|----------|------------|-------------|------------|------------------------------------------------------------------------------|
| 787.4323 | 787.4325   | -0.35       | 20.5       | C <sub>50</sub> H <sub>63</sub> O <sub>2</sub> N <sub>2</sub> S <sub>2</sub> |
|          | 787.4332   | -1.18       | 29.5       | C <sub>58</sub> H <sub>55</sub> S                                            |
|          | 787.4312   | 1.35        | 21.0       | C <sub>48</sub> H <sub>61</sub> ON <sub>5</sub> S <sub>2</sub>               |
|          | 787.4344   | -2.65       | 26.0       | C <sub>52</sub> H <sub>57</sub> O <sub>4</sub> N <sub>3</sub>                |
|          | 787.4299   | 3.05        | 16.0       | C <sub>47</sub> H <sub>65</sub> O <sub>5</sub> N <sub>5</sub> S <sub>2</sub> |
|          | 787.4292   | 3.93        | 25.5       | C <sub>53</sub> H <sub>59</sub> O <sub>2</sub> N <sub>2</sub> S              |
|          | 787.4357   | -4.36       | 25.5       | C <sub>54</sub> H <sub>59</sub> O <sub>5</sub>                               |
|          | 787.4285   | 4.76        | 16.5       | C <sub>45</sub> H <sub>63</sub> O <sub>4</sub> N <sub>4</sub> S <sub>2</sub> |

Fig. S6. HRMS of PDI-TS. calcd for C<sub>50</sub>H<sub>62</sub>N<sub>2</sub>O<sub>2</sub>S<sub>2</sub>, 786.4253 m/z, found [M+H]<sup>+</sup> 787.4323.

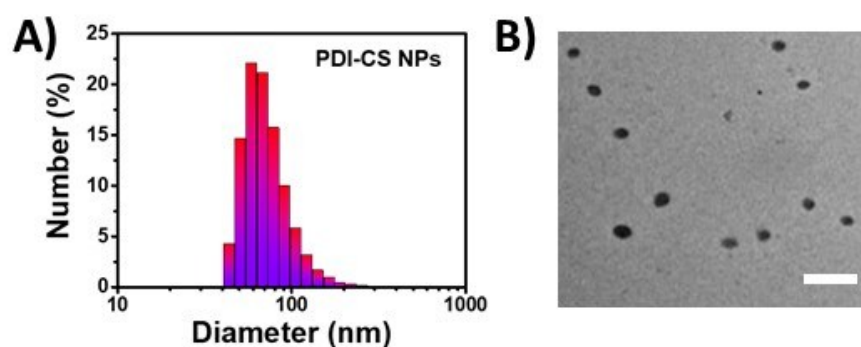

Fig. S7. (A) DLS measurement and (B) TEM image PDI-CS NPs (scale bar: 200 nm).

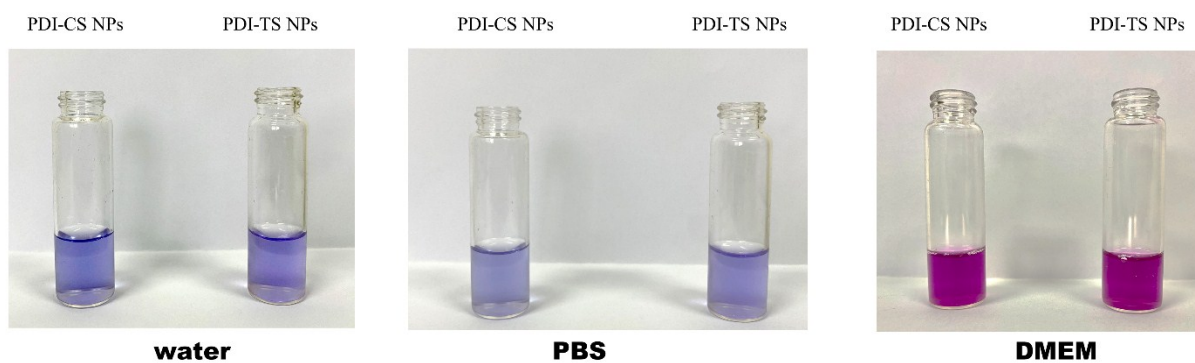

Fig. S8. The stability of PDI-CS and PDI-TS NPs in different solution after being stored in 4 °C refrigerator for four weeks.

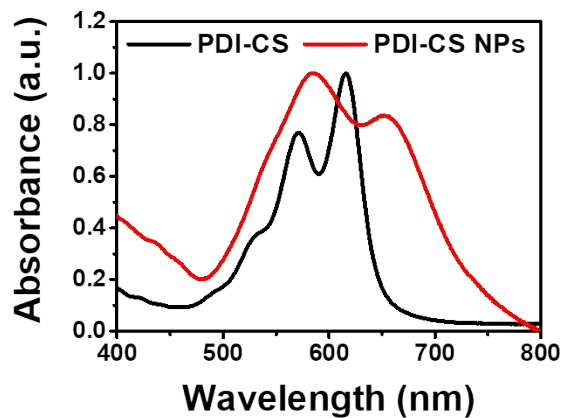

Fig. S9. UV-vis absorption spectra of PDI-CS in THF and NPs in deionized water.

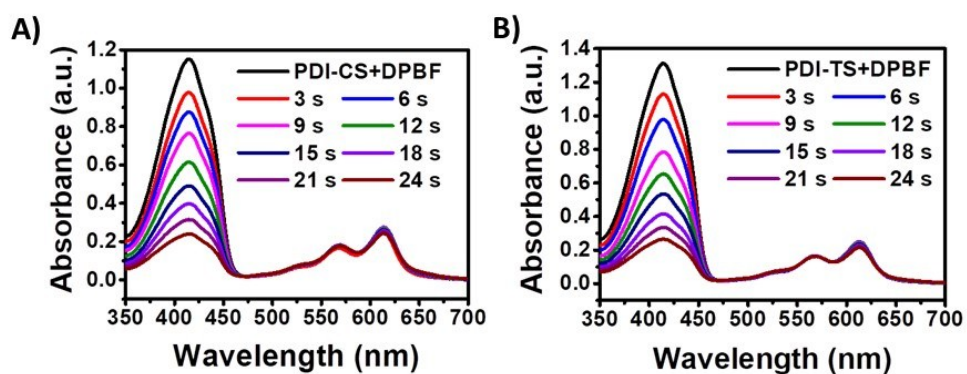

Fig. S10. Absorbance of (A) PDI-CS and (B) PDI-TS with DPBF after photodecomposition by ROS generation upon light irradiation at  $20 \text{ mW cm}^{-2}$ .

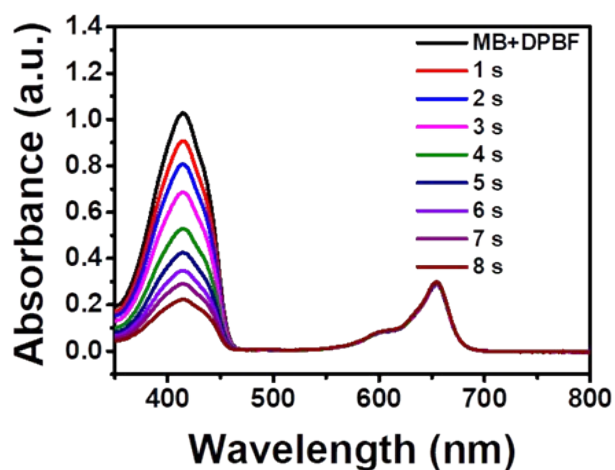

Fig. S11. Absorbance of DPBF after methylene blue (MB) by ROS generation upon light irradiation at  $20 \text{ mW cm}^{-2}$ .

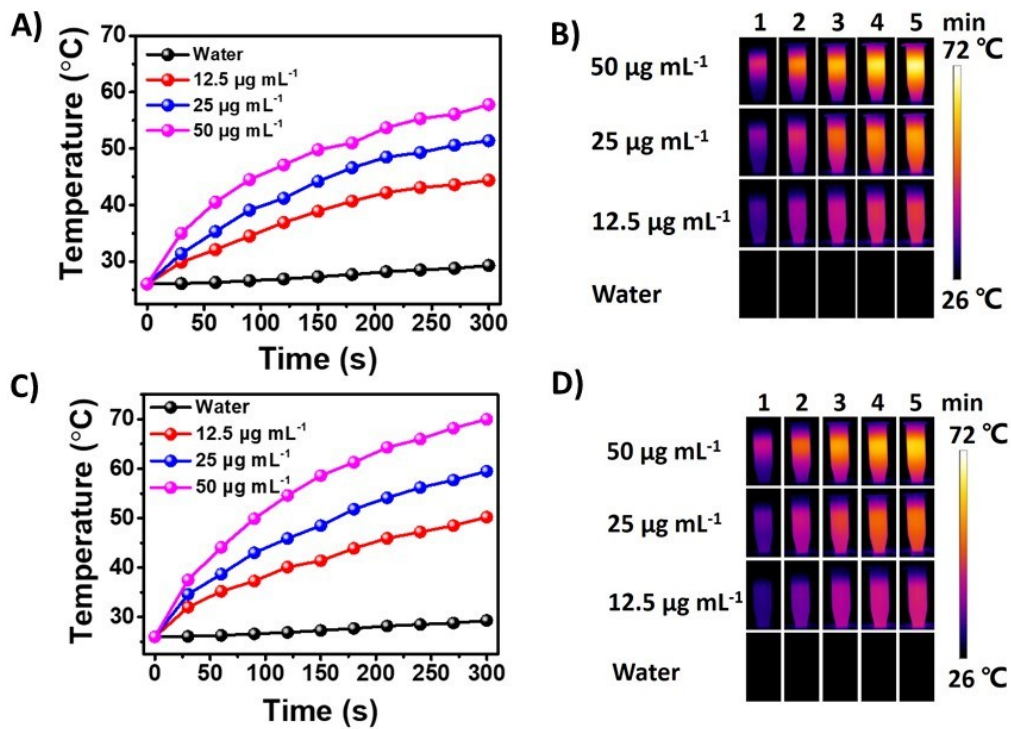

Fig. S12. (A, C) Temperature elevation and (B, D) infrared thermographs of (A, B) PDI-CS and (C, D) PDI-TS NPs aqueous solutions under 660 nm irradiation for 5 min (0.75 W cm<sup>-2</sup>).

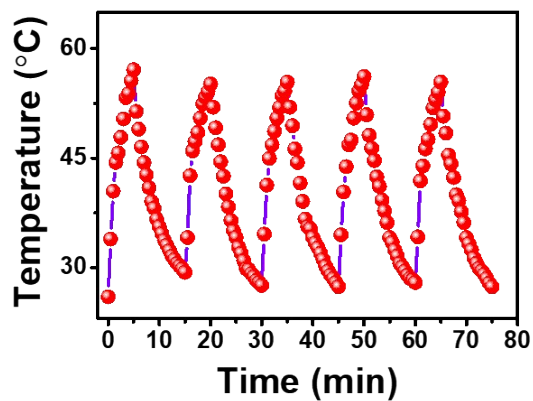

Fig. S13. Temperature profiles of a PDI-CS NPs aqueous dispersion for five laser on/off cycles.

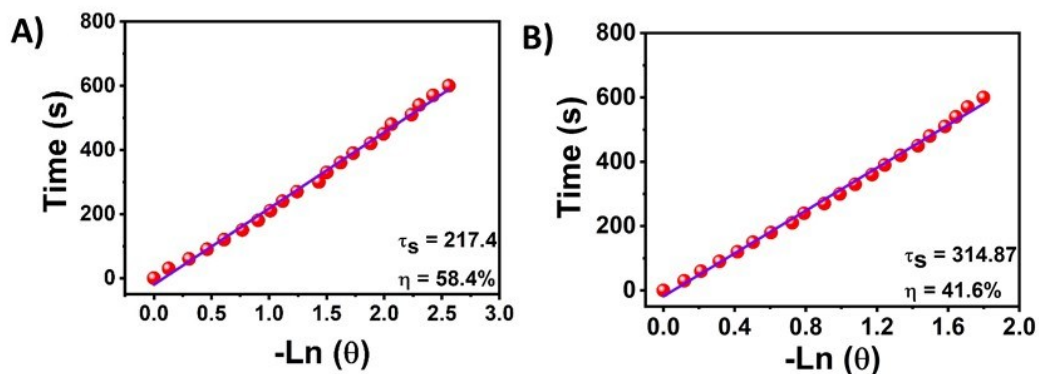

Fig. S14. A plot of time against temperature during the cooling period of (A) PDI-TS NPs and (B) PDI-CS NPs aqueous solution ( $50 \mu\text{g mL}^{-1}$ ) under irradiation for 10 min with a laser ( $660 \text{ nm}$ ,  $0.75 \text{ W cm}^{-2}$ ).

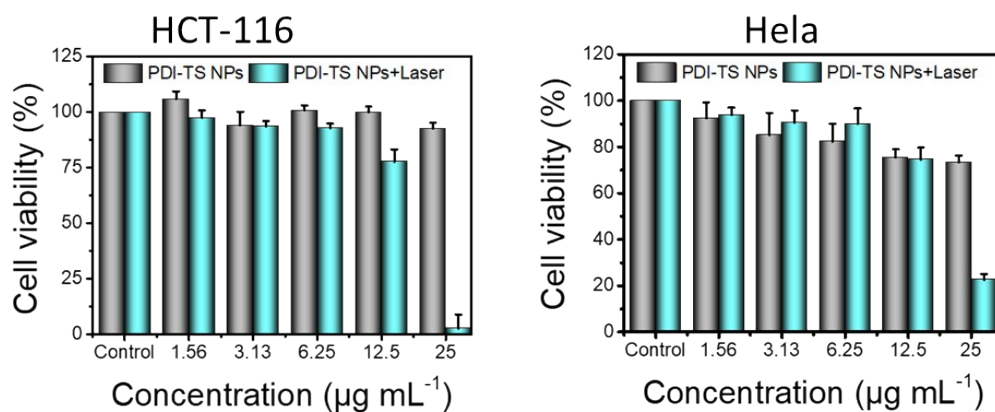

Fig. S15. Cell viability of HCT-116 and HeLa cells after treatment with PDI-TS at different concentrations ( $0$ ,  $1.56$ ,  $3.13$ ,  $6.25$ ,  $12.5$ ,  $25 \mu\text{g mL}^{-1}$ ) plus with  $660 \text{ nm}$  laser irradiation at  $0.75 \text{ W cm}^{-2}$  for 5 min.

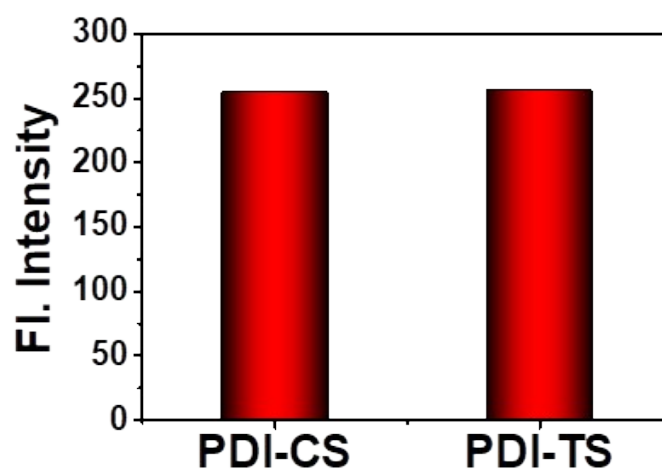

Fig. S16. Fluorescence intensity analysis of ROS production.

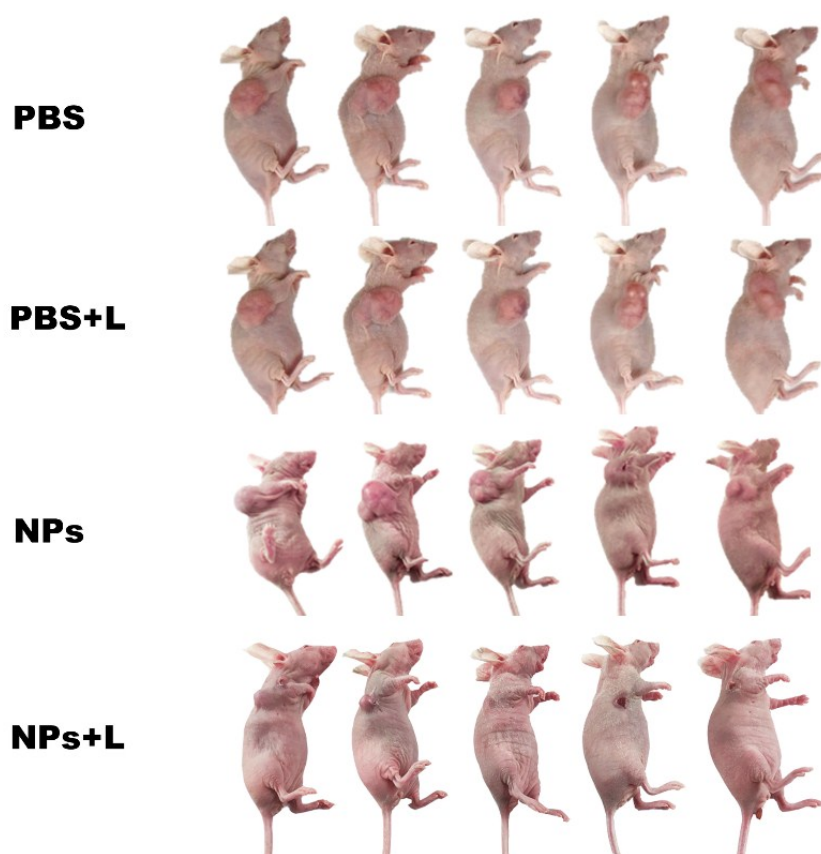

Fig. S17. Representative pictures of tumor-bearing mice after different treatments.

## References

- 1 P. Sun, P. Yuan, G. Wang, W. Deng, S. Tian, C. Wang, X. Lu, W. Huang and Q. Fan, *Biomacromolecules* 2017, **18**, 3375.
- 2 S. Zhang, W. Guo, J. Wei, C. Li, X. Liang and M. Yin, *ACS Nano* 2017, **11**, 3797.
- 3 P. Sun, X. Wang, G. Wang, W. Deng, Q. Shen, R. Jiang, W. Wang, Q. Fan and W. Huang, *J. Mater. Chem. B*, 2018, **6**, 3395
- 4 S. Zhang, J. Li, J. Wei and M. Yin, *Sci. Bull.* 2018, **63**, 101.
